# Supplementary material for: Monodisperse magnetic core/shell microspheres with Pd nanoparticles-incorporated-carbon shells
Source: Royal Society of Chemistry journal article supplement (doi:10.1039/c3dt51478a), 2013-10-30
Supplement: c3dt51478a.pdf [file c3dt51478a.pdf]

## SUPPORTING INFORMATION

### **Monodisperse Magnetic Core/Shell Microspheres with Pd nanoparticles-incorporated-Carbon Shells**

*Qunling Fang<sup>1</sup>, Qing Cheng<sup>2</sup>, Huajian Xu<sup>\*1</sup>, Shouhu Xuan<sup>\*3</sup>*

<sup>1</sup> *School of Medical Engineering, Hefei University of Technology, Hefei, 230009, P.R. China*

<sup>2</sup> *Research Center of Nanjing Institute of Geology and Mineral Resources, Nanjing, 210016, P.R. China*

<sup>3</sup> *CAS Key Laboratory of Mechanical Behavior and Design of Materials, Department of Modern Mechanics, University of Science and Technological of China, Hefei, 230027, P.R. China*

\* Corresponding Author

Huajian Xu

Phone: +86 551 62904353

Fax: +86 551 62904353

E-mail: [hjxu@hfut.edu.cn](mailto:hjxu@hfut.edu.cn);

Shouhu Xuan

Phone: +86 551 63606382

Fax: +86 551 63606382

E-mail: [xuansh@ustc.edu.cn](mailto:xuansh@ustc.edu.cn);

*Suzuki Cross-coupling Reaction:* In a 10 mL glass flask were placed 1 mmol aryl halide, 1.2 mmol boronic acid, 2mmol  $\text{Na}_2\text{CO}_3$ , and 0.1 mol %  $\text{Fe}_3\text{O}_4@\text{C}/\text{Pd}$  in 1.5mL/1.5mL Dimethyl Ether (DME)- $\text{H}_2\text{O}$  at  $110^\circ\text{C}$  for the appropriate time. The reaction was monitored by TLC, and after completion of the reaction, the catalyst was magnetically separated and the mixture was extracted with ethyl acetate three times. The combined organic extracts were dried over anhydrous  $\text{Na}_2\text{SO}_4$  and evaporated under reduced pressure, and the mixture was then purified by column chromatography over silica gel to afford product with high purity.

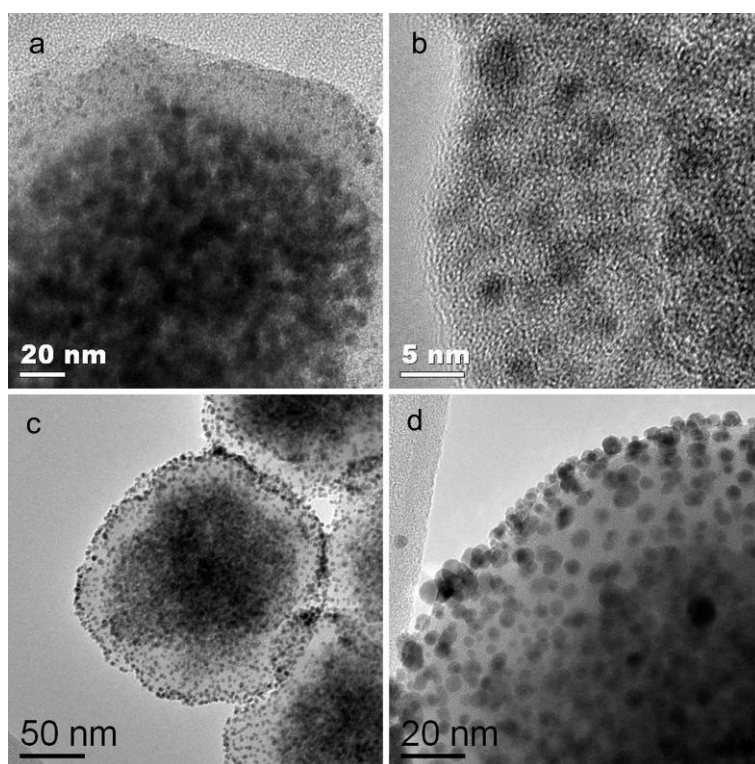

**Figure SI1.** TEM images of the as-prepared  $\text{Fe}_3\text{O}_4@\text{C}/\text{Pd}$  (a,b),  $\text{Fe}_3\text{O}_4@\text{Polyaniline}/\text{Au}$  (c),  $\text{Fe}_3\text{O}_4@\text{SiO}_2/\text{Au}$  microspheres (d).

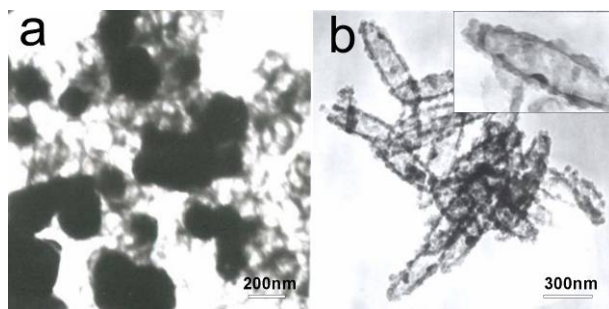

**Figure SI2.** TEM images of the products obtained by vacuum heating the  $\text{Fe}_2\text{O}_3$ @polyaniline precursors: a) the spherical  $\text{Fe}_2\text{O}_3$ @polyaniline and b) spindle  $\text{Fe}_2\text{O}_3$ @polyaniline.

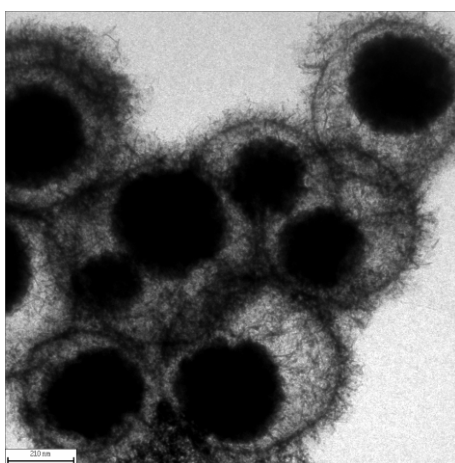

**Figure SI3.** TEM images of the  $\text{Fe}_3\text{O}_4$ @ $\text{NiSiO}_3$ /Pd microspheres with 4 nm Pd nanocrystals.
